# Supplementary material for: Histone variant dictates fate biasing of neural crest cells to melanocyte lineage
Source: Oxford University Press journal article supplement (doi:10.1242/dev.182576), 2020-02-25
Supplement: dev182576supp.pdf [file dev182576supp.pdf]

## Supplementary figures

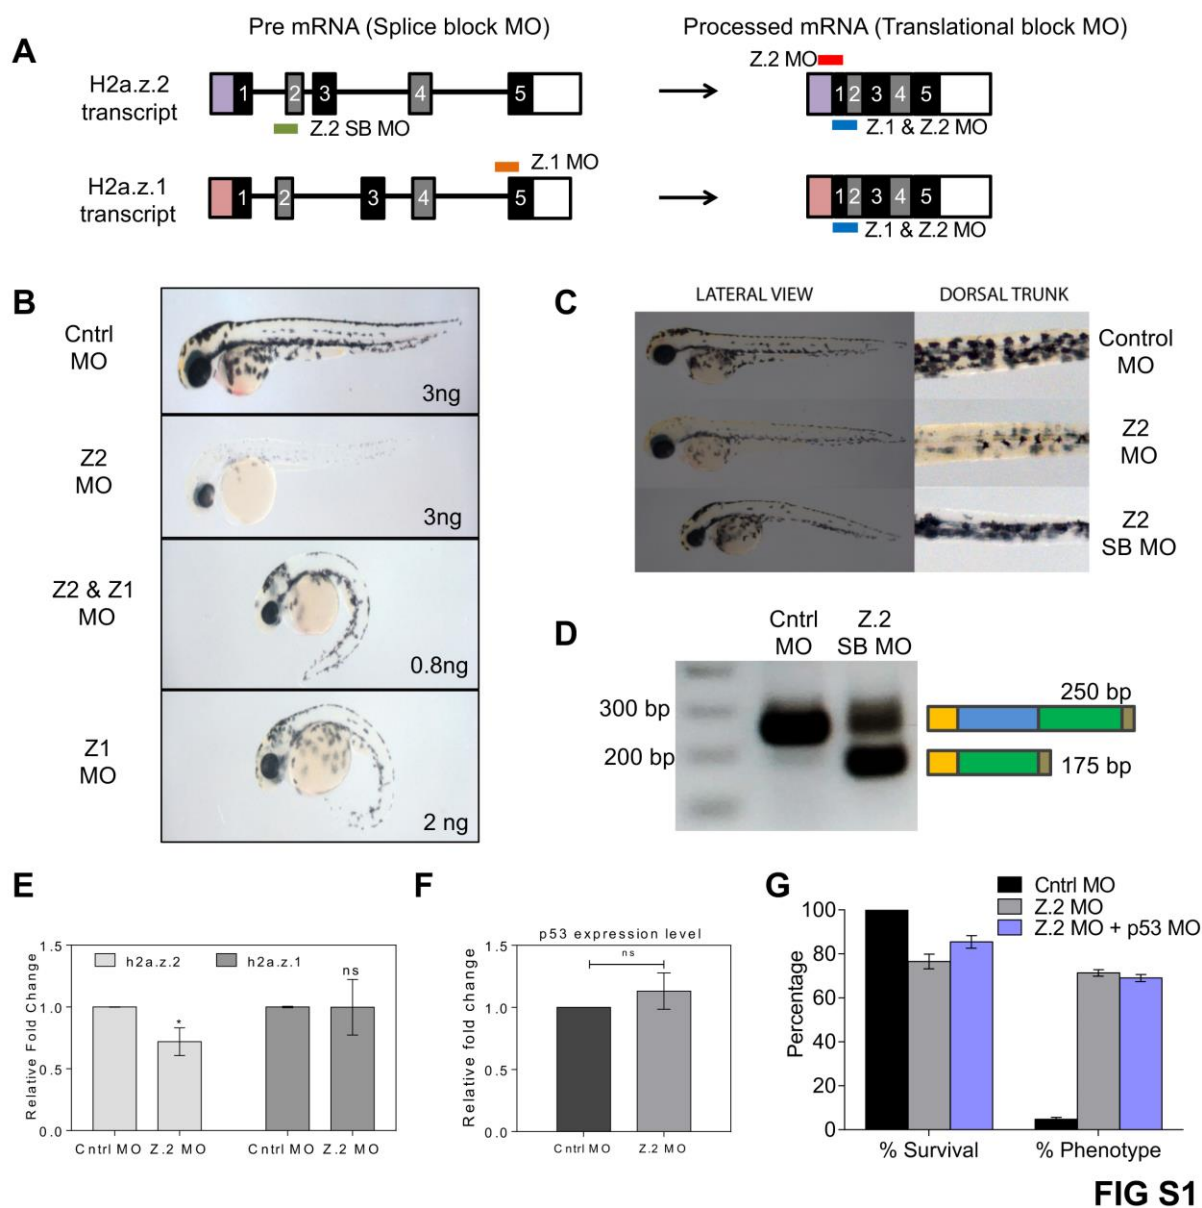

**Fig S1: Validating H2a.z.2 specific pigmentation phenotype using multiple silencing approaches**

(A) Schematic representing the target region for H2a.z.2 MO (Z2), H2a.z.1 MO (Z1), H2a.z.2 splice block (Z2 SB MO) and Z2 & Z1 MO.

(B) Brightfield images representing 48 hpf embryos injected with Control MO, Z2 MO, Z1 MO, Z1 & Z2 MO.

(C) Brightfield images showing lateral and dorsal view of Control MO, Z2 MO and Z2 SB MO embryos at 48 hpf.

(D) H2a.z.2 RT-PCR amplicons from control and Z2 SB MO injected embryos depicting the mis-spliced product.

- (E) Bar graphs representing mRNA levels of h2a.z.1 and h2a.z.2 upon Z2 MO injection. Bars represent mean  $\pm$  SEM across n=3 biological replicates.
- (F) Bar graphs representing relative p53 mRNA levels in Z2 MO as compared to control MO. Bars represent mean  $\pm$  SEM across n=5 biological replicates.
- (G) Grouped bar plots representing percentage survival and pigmentation phenotype observed across control MO, Z2 MO and Z2 + p53 MO. Bars represent mean  $\pm$  SEM across n=6 biological replicates.

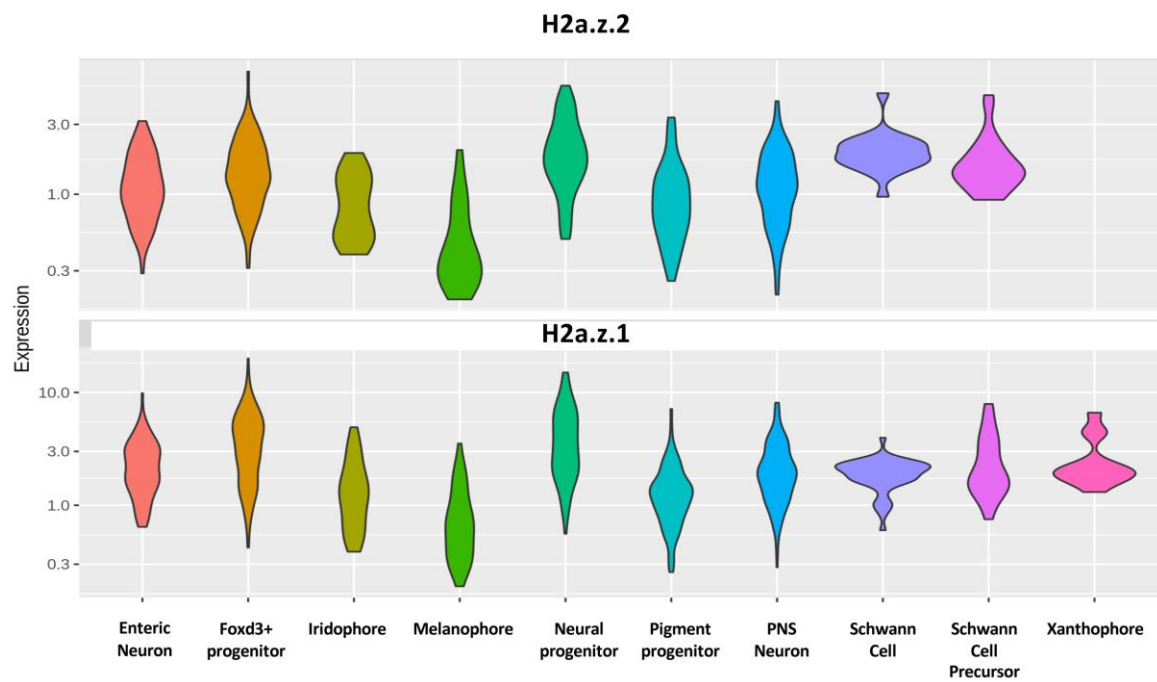

FIG S2

**Fig S2: Single cell meta-analysis of zebrafish *sox10* positive cells and their derivatives.**

Expression of H2a.z.2 (Adameyko et al.) and H2a.z.1 (bottom) from zebrafish single cell sequencing data (GSE131136), X-axis different cell types are indicated, Y-axis represents gene expression values in UMI counts.

**A**

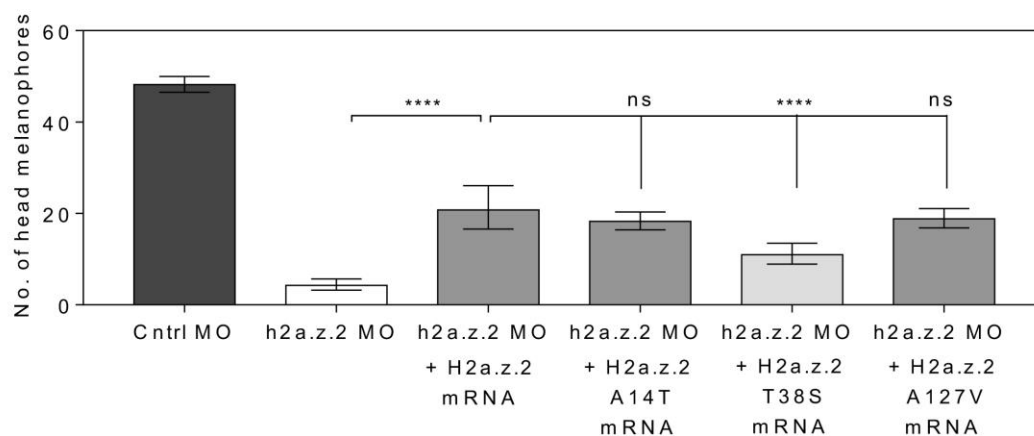

**B**

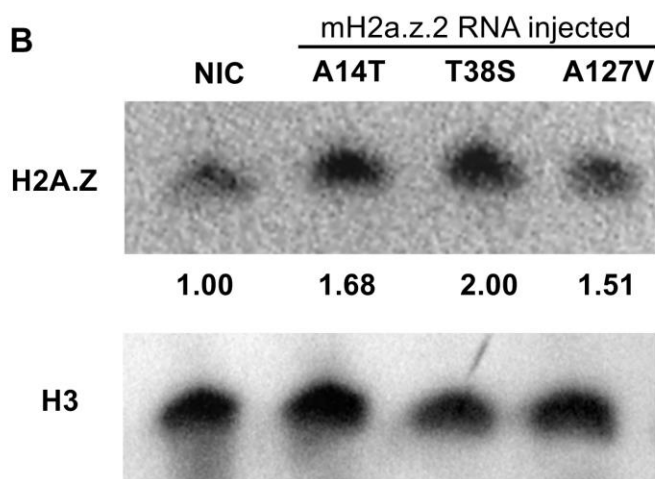

**FIG S3**

**Fig S3: A single amino acid substitution of T38S in mouse H2A.Z.2 contributes largely to the observed pigmentation effects**

(A) Bar graphs representing the number of head melanophores, denote geometric mean with 95% CI, representing data of  $n \geq 50$  embryos.

(B) Western blot analysis using H2AZ antibody in RNA injected embryos with H2a.z.2 mutants, normalised to H3. Numbers represent H3 normalized fold change compared to non-injected control (Adameyko et al.).

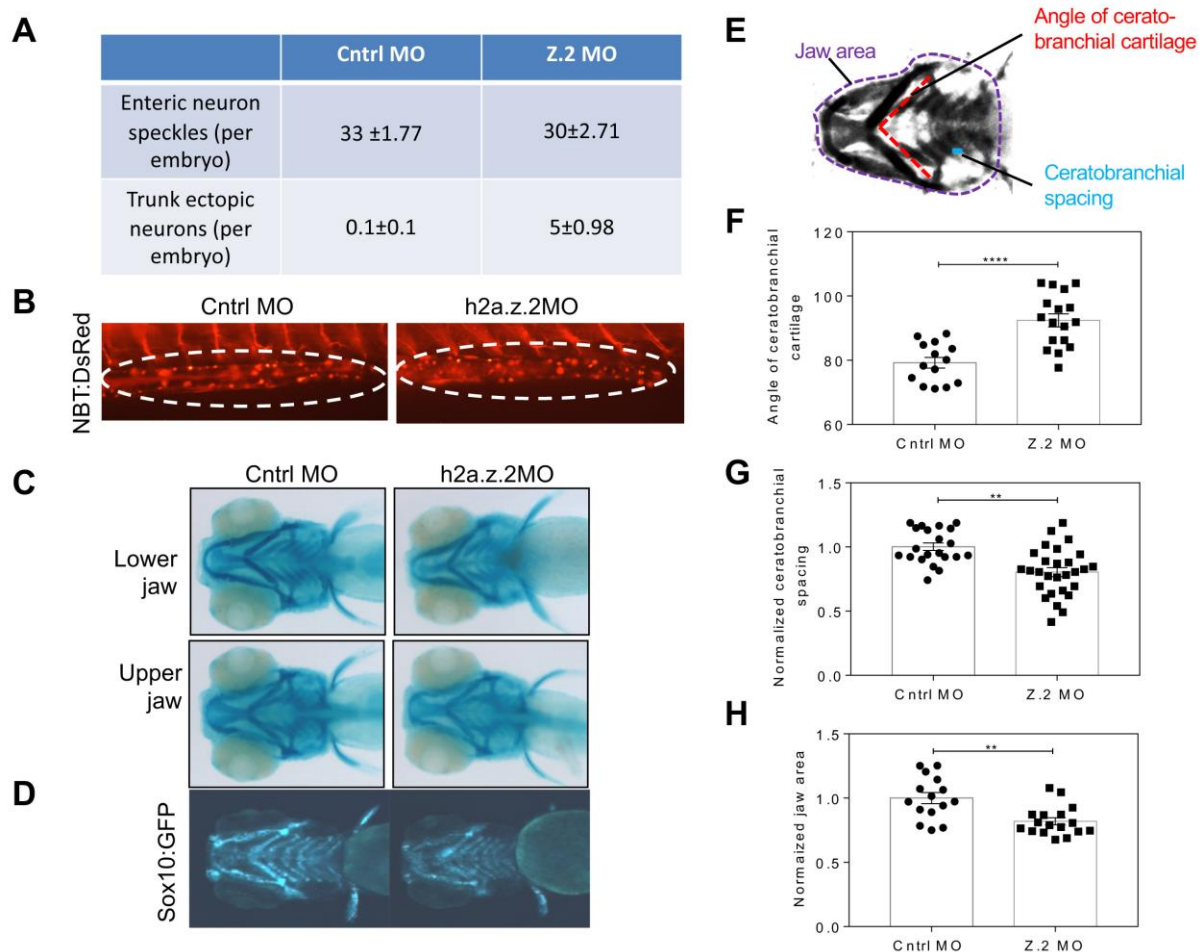

FIG S4

**Fig S4: Status of neural crest derivatives in H2a.z.2 morphants**

- (A) Table enumerating the number of enteric, and trunk ectopic neurons observed in control and Z2 morphants. Numbers represent mean ± SD counted manually across ~50 embryos.
- (B) Fluorescence images of enteric neurons in control and Z2 morphants in *Tg(NBT:DsRed)* fish embryos at 5 dpf.
- (C) Alcian blue staining highlighting the craniofacial cartilage and fin cartilage in control and Z2 morphants.
- (D) Fluorescence images of *Tg(sox10:EGFP)* head region representing the craniofacial cartilage system in control and Z2 morphants.
- (E) Image representing the parameters utilized for jaw defect quantification in Z2 morphants represented in panels F to H.
- (F) Bar graphs representing angle of the ceratobranchial cartilage in Z2 MO as compared to control. Bars represent mean ± SEM across  $n \geq 15$  embryos.
- (G) Bar graphs representing ceratobranchial spacing in Z2 MO as compared to control. Bars represent mean ± SEM across  $n \geq 15$  embryos.
- (H) Bar graphs representing area of the jaw in Z2 MO as compared to control. Bars represent mean ± SEM across  $n \geq 15$  embryos.

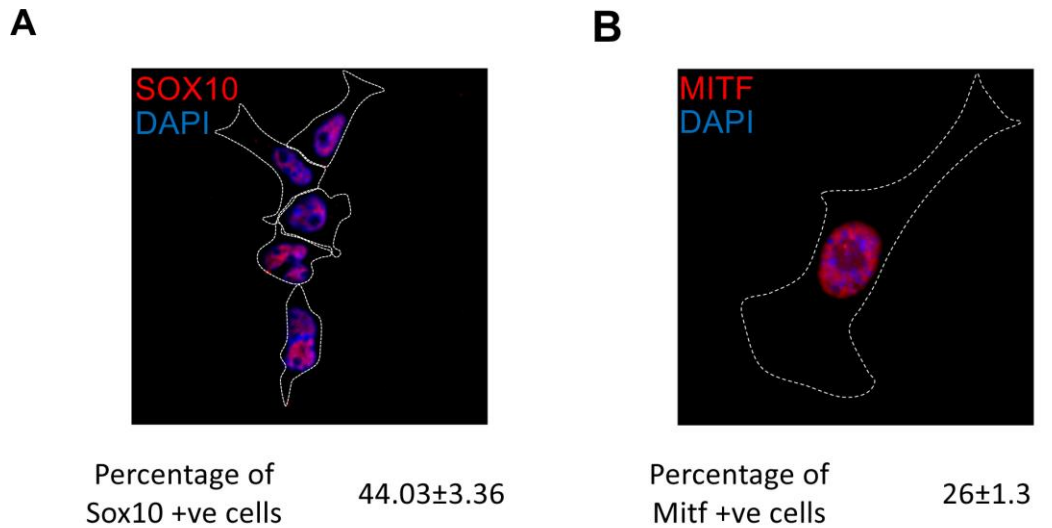

**FIG S5**

**Fig S5: R1E to melanocyte differentiation generates SOX10 and MITF positive cells**

- (A) Immunocytochemistry for SOX10 counterstained with DAPI in Day10 after differentiation in melanocyte promoting medium.
- (B) Immunocytochemistry for MITF counterstained with DAPI in Day10 differentiated cells.

Numbers at the bottom of the image represents percentage of cells positive for SOX10 and MITF staining respectively. At least 500 cells were taken for analysis.

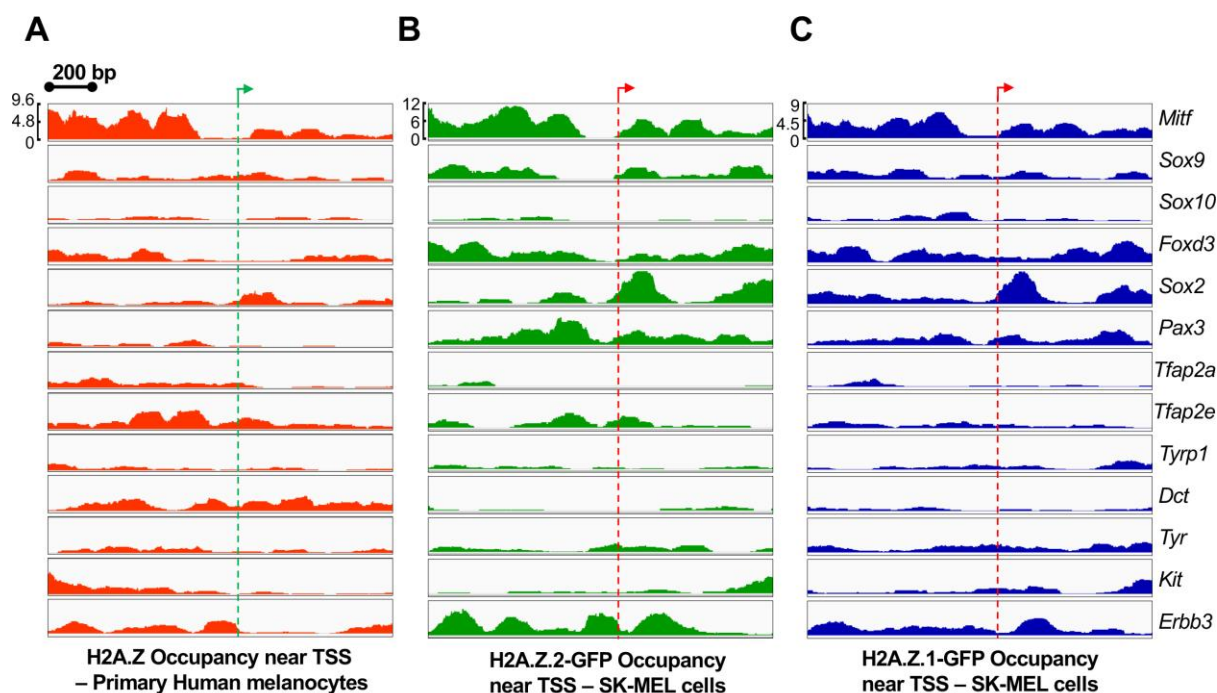

**FIG S6**

**Fig S6: H2A.Z occupancy in primary melanocytes and SKMEL cells**

(A-C) Metanalysis of chromatin immunoprecipitation (ChIP) data in melanocyte derived lines from GSE68223.

(A) H2A.Z (Z1 + Z2) occupancy near transcription start site (TSS) in primary human melanocytes.

(B) H2A.Z.2-GFP occupancy near TSS in SK-Mel 147 metastatic melanoma cells.

(C) H2A.Z.1-GFP occupancy near TSS in SK-Mel 147 metastatic melanoma cells.

Dotted line indicates the TSS. Gene names are displayed on right corresponding to their ChIP seq profiles. Percent enrichment relative to input in the ChIP-seq data is displayed to the left for the top panel.



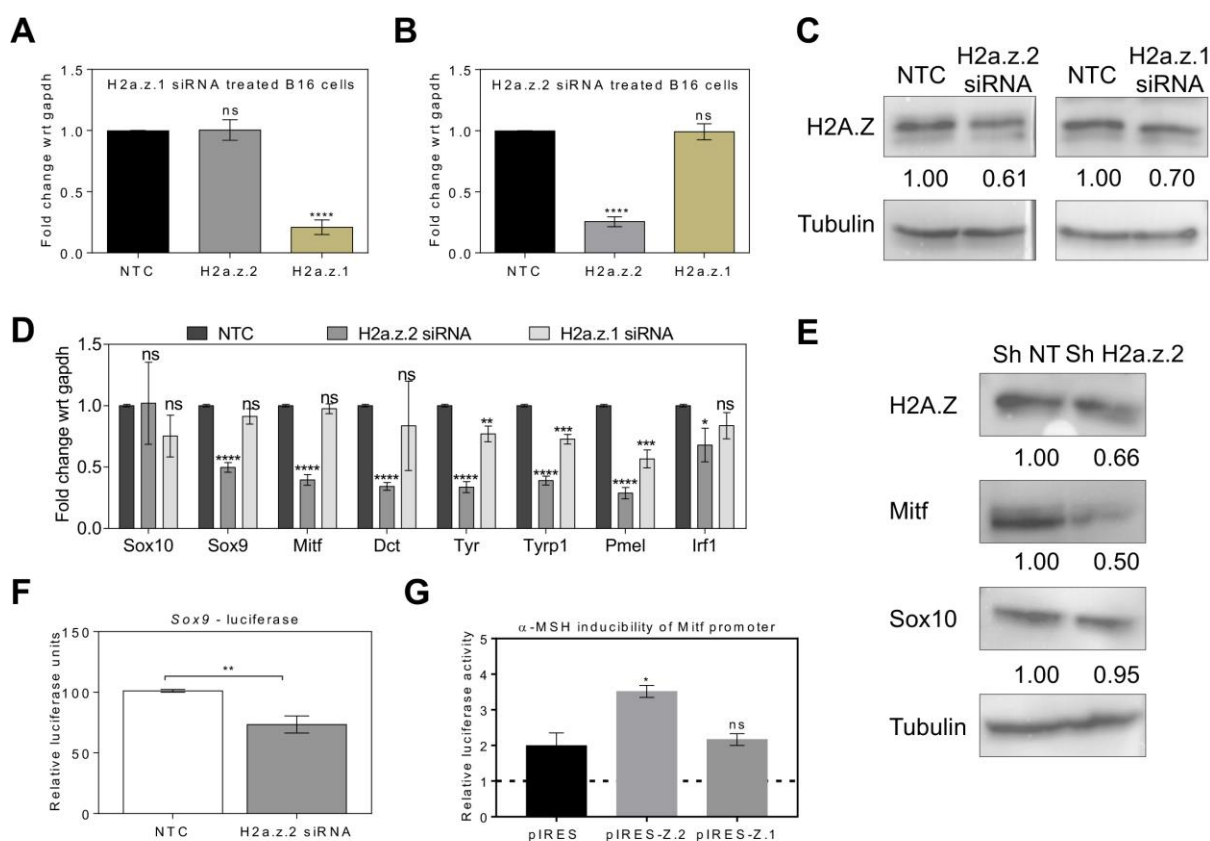

FIG S7

**Fig S7: H2A.Z mediates gene expression changes in B16 melanoma cells**

(A) Bar graph representing mRNA levels of *H2a.z.1* and *H2a.z.2* upon *Z1* silencing (mean  $\pm$  SEM, n=3).

(B) Bar graph representing mRNA levels of *H2a.z.1* and *H2a.z.2* upon *Z2* silencing (mean  $\pm$  SEM, n=3).

(C) Western blot analysis of total H2A.Z levels upon H2a.z.1 and H2a.z.2 siRNA treatment, normalized to tubulin.

(D) Bar plot representing relative mRNA levels of pigmentation related genes upon *Z2* and *Z1* silencing in B16 cells (mean  $\pm$  SEM, n=3).

(E) Western blot analysis of total H2A.Z, MITF and SOX10 levels upon H2a.z.2 shRNA treatment in B16 melanoma cells, normalized to tubulin. Numbers represent tubulin normalized values with respect to shNT condition.

(F) Bar graphs representing the relative Sox9 luciferase activity of cells treated with non targeting control and *Z2* siRNA (mean $\pm$ SEM, N=4).

(G) Bar graphs representing the relative Mitf luciferase activity of B16 stable cells transfected with empty pIRES vector or pIRES containing H2a.z.1 or H2a.z.2 upon  $\alpha$ -MSH treatment (mean  $\pm$  SEM, n=4).



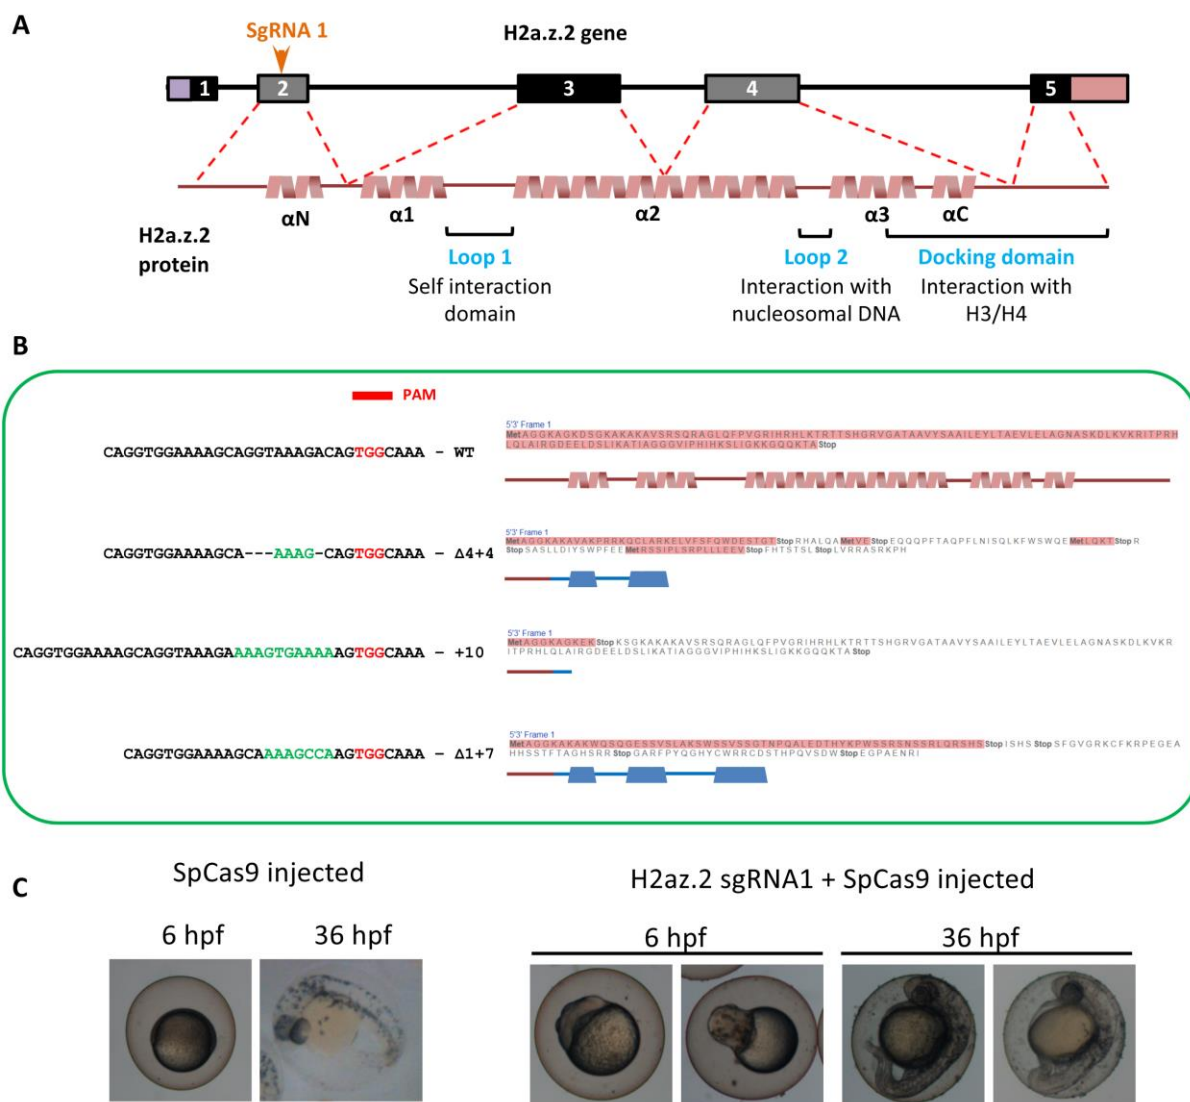

**FIG S8**

**Fig S8: CRISPR mediated targeting of *h2a.z.2* N-terminus region is lethal in zebrafish**  
 (A) Schematic representing the region targeted by *h2a.z.2* sgRNA1.  
 (B) Sequences displaying representative mutations occurred upon *h2a.z.2* sgRNA1 injections leading to embryonic lethality; predicted protein sequences are displayed on the right hand side.  
 (C) Bright field images of SpCas9 and SpCas9 + sgRNA1 injected embryos at 6 and 36 hpf.

TABLE S1

| REAGENT or RESOURCE                                                                                                  | SOURCE                   | IDENTIFIER                                              |
|----------------------------------------------------------------------------------------------------------------------|--------------------------|---------------------------------------------------------|
| <b>Antibodies</b>                                                                                                    |                          |                                                         |
| Anti-Histone H2A.Z antibody                                                                                          | Abcam                    | Cat No: ab4174;<br>RRID:AB_304345                       |
| Anti-Histone H3 antibody                                                                                             | Abcam                    | Cat No:ab1791;<br>RRID:AB_302613                        |
| Anti-Beta tubulin antibody-HRP                                                                                       | Abcam                    | Cat No: ab21058;<br>RRID:AB_727045                      |
| Anti-MITF antibody                                                                                                   | Abcam                    | Cat No: ab12039;<br>RRID:AB_298801                      |
| Anti-SOX10 antibody                                                                                                  | Abcam                    | Cat No: ab155279;<br>RRID:AB_2650603                    |
| Anti-Digoxigenin-AP, Fab fragments from sheep                                                                        | Sigma                    | Cat No:<br><b>11093274910</b> Roche<br>; RRID:AB_514497 |
| Anti-Rabbit IgG                                                                                                      | Thermo Fisher Scientific | Cat No: 02-6102;<br>RRID:AB_2532938                     |
| Goat anti-Mouse IgG (H+L) Cross-Adsorbed ReadyProbes™ Secondary Antibody, Alexa Fluor 594, Thermo Fisher Scientific  | Thermo Fisher Scientific | Cat No: R37121;<br>RRID: AB_2556549                     |
| Goat anti-Rabbit IgG (H+L) Cross-Adsorbed ReadyProbes™ Secondary Antibody, Alexa Fluor 594, Thermo Fisher Scientific | Thermo Fisher Scientific | Cat No: A-11037;<br>RRID: AB_25344095                   |
| <b>Chemicals, Peptides, and Recombinant Proteins</b>                                                                 |                          |                                                         |
| N-Phenylthiourea                                                                                                     | Sigma                    | Cat No: P7629                                           |
| Pronase                                                                                                              | Sigma                    | Cat No: P8811                                           |
| TrypLE Express                                                                                                       | Thermo Fisher Scientific | Cat No: 12604039                                        |
| DMEM-High glucose media                                                                                              | Sigma                    | Cat No: D5648                                           |
| Fetal Bovine Serum                                                                                                   | Thermo Fisher Scientific | Cat No: 10270-106                                       |
| DMEM-Glutamax supplemented with sodium pyruvate                                                                      | Thermo Fisher Scientific | Cat No: 10569-010                                       |
| MEM-NEAA                                                                                                             | Thermo Fisher Scientific | Cat No: 11140-050                                       |
| Beta-mercaptoethanol                                                                                                 | Thermo Fisher Scientific | Cat No: 31350-010                                       |
| PANSERA                                                                                                              | Pan Biotech              | Cat No: P30-2602                                        |
| Collagen                                                                                                             | Thermo Fisher Scientific | Cat No: A10483-01                                       |
| M254                                                                                                                 | Thermo Fisher Scientific | Cat No: M254-CF                                         |
| SCF                                                                                                                  | Peprotech                | Cat No: 300-07-10                                       |

|                                    |                          |                          |
|------------------------------------|--------------------------|--------------------------|
| Endothelin-3                       | Sigma                    | Cat No: E9137            |
| Cholera toxin                      | Sigma                    | Cat No: C8052            |
| Dexamethasone                      | Sigma                    | Cat No: D1756            |
| WNT-3a                             | Peprotech                | Cat No: 315-20-10        |
| b-FGF                              | Thermo Fisher Scientific | Cat No: RFGFB50          |
| PMA                                | Sigma                    | Cat No: P1585            |
| N2-Supplement                      | Thermo Fisher Scientific | Cat No: 17502-048        |
| Anti-Anti                          | Thermo Fisher Scientific | Cat No: 15240-062        |
| Protein A agarose beads            | G-Biosciences            | Cat No: 786-283          |
| SYBR Green                         | KAPA biosystems          | Cat No: KK4601           |
| Alpha-MSH                          | Sigma                    | Cat No: M4135            |
| <b>Critical Commercial Assays</b>  |                          |                          |
| Zero Blunt TOPO vector             | Thermo Fisher Scientific | Cat No: K287540          |
| T7-ULTRA mRNA synthesis kit        | Thermo Fisher Scientific | Cat No: AM1345           |
| Nucleospin RNA XS kit              | Macherey Nagel           | Cat No: 740902           |
| Non targeting control siRNA        | Dharmacon ON-TARGETplus  | Cat No: D-001810-10-05   |
| Mouse <i>H2a.z.2</i> siRNA         | Dharmacon ON-TARGETplus  | Cat No: L-063612-01-0005 |
| Mouse <i>H2a.z.1</i> siRNA         | Dharmacon ON-TARGETplus  | Cat No: L-042994-01-0005 |
| Dharmafect transfection reagent    | Dharmacon                | Cat No: T-2001           |
| Lipofectamine 2000                 | Thermo Fisher Scientific | Cat No: 11668019         |
| Nucleospin Triprep                 | Macherey Nagel           | Cat No: 740966           |
| Superscript III cDNA synthesis kit | Thermo Fisher Scientific | Cat No: 1800051          |
| GIPZ <i>H2a.z.2</i> shRNA          | Dharmacon                | Cat No: RMM4532-EG77605  |
| BCA Kit                            | Thermo Fisher Scientific | Cat No: 23225            |
| QUBIT ds HS DNA estimation kit     | Thermo Fisher Scientific | Cat No: Q32851           |
| Dual luciferase assay system       | Promega                  | Cat No: E1960            |
| T7 Megashortscript kit             | Thermo Fisher Scientific | Cat No: AM1354           |
|                                    |                          |                          |

| <b>Deposited Data</b>                                                                     |                         |                                   |
|-------------------------------------------------------------------------------------------|-------------------------|-----------------------------------|
| Raw and analyzed microarray data                                                          | This paper              | GSE133141                         |
| <b>Experimental Models: Cell Lines</b>                                                    |                         |                                   |
| B16 melanoma cell                                                                         |                         | RRID: CVCL_0158                   |
| ES-R1 cell line                                                                           |                         | RRID: CVCL_2167                   |
| <b>Experimental Models: Organisms/Strains</b>                                             |                         |                                   |
| ASWT                                                                                      | Patowary A et al; 2013. | ZFIN ID: ZDB-PUB-130423-9         |
| <i>Tg(-4.9Sox10:egfp)<sup>ba2</sup></i>                                                   | Carney T J et al; 2006. | ZFIN ID: ZDB-ALT-050913-4         |
| <i>Tg(mitfa:GFP)<sup>w47</sup></i>                                                        | Curran K et al; 2009.   | ZFIN ID: ZDB-ALT-081203-1         |
| <i>Tg(NBT-dsRed)</i>                                                                      | Peri F et al; 2008.     | ZFIN ID: ZDB-TGCONSTRCT-081023-2  |
| <i>Tg(foxd3:GFP)</i>                                                                      | Gilnour DT et al; 2002  | ZFIN ID: ZDB-TGCONSTRCT-070117-95 |
| <i>Tg(ftyrp1:GFP)</i>                                                                     | Zou J et al; 2006.      | N/A                               |
| <b>Oligonucleotides</b>                                                                   |                         |                                   |
| T7 promoter-Mouse H2a.z.1 CDS FP:<br>TAATACGACTCACTATAGGGAGAGCA<br>AACATGGCTGGCGGTAAGGC   | This paper;<br>Sigma    | N/A                               |
| Mouse H2a.z.1 CDS RP:<br>TTAAACAGTCTTCTGTTGTCCTTTC                                        | This paper;<br>Sigma    | N/A                               |
| T7 promoter-Mouse H2a.z.2 CDS FP:<br>TAATACGACTCACTATAGGGAGAGCA<br>AACATGGCTGGAGGCAAAGCTG | This paper;<br>Sigma    | N/A                               |
| Mouse H2a.z.2 CDS RP:<br>CTAAGCAGTTTTCTGCTGCCCC                                           | This paper;<br>Sigma    | N/A                               |
| Zebrafish <i>mitfa</i> CDS FP:<br>ATGTTGGAGATGCTCGAGTA                                    | This paper;<br>Sigma    | N/A                               |
| Zebrafish <i>mitfa</i> CDS RP:<br>CTAACAGCCATTGTCATGTT                                    | This paper;<br>Sigma    | N/A                               |
| Zebrafish <i>h2a.z.2</i> WISH FP:<br>GTGCAGACATGACTCAAGGACT                               | This paper;<br>Sigma    | N/A                               |
| Zebrafish <i>h2a.z.2</i> WISH RP:<br>ATAAAACAGCTCCACGGCTC                                 | This paper;<br>Sigma    | N/A                               |
| Z.2 Splice block check primer FP:<br>ACCTCCCAGGATCCCATTCA                                 | This paper;<br>Sigma    | N/A                               |
| Z.2 Splice block check primer RP:<br>TGCCAACTCCAAAACCTTCAGC                               | This paper;<br>Sigma    | N/A                               |
| Z.1 MO<br>TGTGAGGAATGACTCCTGCGGACGC                                                       | Sivasubbu S et al; 2006 | N/A                               |

|                                                                                                   |                          |     |
|---------------------------------------------------------------------------------------------------|--------------------------|-----|
| Z.2 MO<br>CCACCTGCCATTTTCAGCGATGT                                                                 | This paper;<br>Genetools | N/A |
| Z.1 – Z.2 MO<br>CTTTACCTGCTTTTCCACCTGCCAT                                                         | This paper;<br>Genetools | N/A |
| Z.2 Splice block MO<br>TCCACCTGCCTGCAAAACAATAATT                                                  | This paper;<br>Genetools | N/A |
| Control MO<br>CCTCTTACCTCAGTTACAATTTATA                                                           | Genetools                | N/A |
| P53 MO<br>GCGCCATTGCTTTGCAAGAATTG                                                                 | Genetools                | N/A |
| Zebrafish <i>h2a.z.2</i> sgRNA 1<br>GGAAAAGCAGGTAAAGACAG                                          | This paper;<br>Sigma     | N/A |
| Zebrafish <i>h2a.z.2</i> sgRNA 2<br>GGGAGCTCCTCATCTCCTCGAA                                        | This paper;<br>Sigma     | N/A |
| Zebrafish <i>h2a.z.2</i> sgRNA 3<br>GGAGCTCGATTCCCTTATCA                                          | This paper;<br>Sigma     | N/A |
| Zebrafish <i>h2a.z.2</i> sgRNA 4<br>GGA ACTATGCGGTTTTCTGC                                         | This paper;<br>Sigma     | N/A |
| Zebrafish <i>h2a.z.2</i> sgRNA 1<br>target region amplification FP<br>TGTTTGCTTGCATTGGATTGAGT     | This paper;<br>Sigma     | N/A |
| Zebrafish <i>h2a.z.2</i> sgRNA 1<br>target region amplification RP<br>CAGCTGTGAGATATTC AAGAATGG   | This paper;<br>Sigma     | N/A |
| Zebrafish <i>h2a.z.2</i> sgRNA 2&3<br>target region amplification FP<br>CATTGAAGCTGATATGGCAA ACTT | This paper;<br>Sigma     | N/A |
| Zebrafish <i>h2a.z.2</i> sgRNA 2&3<br>target region amplification RP<br>AGGGGTCAATTTTGAAGCTCTTG   | This paper;<br>Sigma     | N/A |
| Zebrafish <i>h2a.z.2</i> sgRNA 4<br>target region amplification FP<br>CCCGAGCTGTCTTAATGTGC        | This paper;<br>Sigma     | N/A |
| Zebrafish <i>h2a.z.2</i> sgRNA 4<br>target region amplification RP<br>TGGATTAAAGGATGAACACAAGC     | This paper;<br>Sigma     | N/A |
| Mitf ChIP FP<br>TTCTGGTCCAAGTCCCAAGC                                                              | This paper;<br>Sigma     | N/A |
| Mitf ChIP RP<br>ACTTCGAAATCCGCCACGAT                                                              | This paper;<br>Sigma     | N/A |
| Sox9 ChIP FP<br>CTCGGAACTGCCTGGAACTT                                                              | This paper;<br>Sigma     | N/A |
| Sox9 ChIP RP<br>AAAACAGAGAACGAAACCGGG                                                             | This paper;<br>Sigma     | N/A |
| Sox10 ChIP FP<br>TTCAGGCTCCGTCCAGACAAG                                                            | This paper;<br>Sigma     | N/A |
| Sox10 ChIP RP<br>CAAGGTGTGCGGTCCAGC                                                               | This paper;<br>Sigma     | N/A |
| Foxd3 ChIP FP<br>CGTAGAGAAGCGTCGAGGAC                                                             | This paper;<br>Sigma     | N/A |

|                                                                              |                      |     |
|------------------------------------------------------------------------------|----------------------|-----|
| Foxd3 ChIP RP<br>GTCAGCTCACACGAGGAGG                                         | This paper;<br>Sigma | N/A |
| Pax3 ChIP FP<br>GTCTCCTCCTCGGCCAATCG                                         | This paper;<br>Sigma | N/A |
| Pax3 ChIP RP<br>GGGATCCGGACTAGGGAGC                                          | This paper;<br>Sigma | N/A |
| Sox2 ChIP FP<br>GGCAGAGAAGAGAGTGTTTGC                                        | This paper;<br>Sigma | N/A |
| Sox2 ChIP RP<br>CTTAAGCCTCGGGCTCCAAA                                         | This paper;<br>Sigma | N/A |
| Tfap2a ChIP FP<br>TGTGATTCGCCAGACGCC                                         | This paper;<br>Sigma | N/A |
| Tfap2a ChIP RP<br>GAGACAAAAAGCGAGCGACG                                       | This paper;<br>Sigma | N/A |
| C-kit ChIP FP<br>ATCTGCTCTGCGTCCTGTTG                                        | This paper;<br>Sigma | N/A |
| C-kit ChIP RP<br>GGGTGCAGTCCTCTTGTCTG                                        | This paper;<br>Sigma | N/A |
| Tfap2e ChIP FP<br>CACCCGTTGCCCGACTTTTT                                       | This paper;<br>Sigma | N/A |
| Tfap2e ChIP RP<br>AAGGTACGGGGTACTCAGCG                                       | This paper;<br>Sigma | N/A |
| Dct ChIP FP<br>GGGAGCTTTCGTCTTGCTCT                                          | This paper;<br>Sigma | N/A |
| Dct ChIP RP<br>TCCATTAAGGGCGCATAGCC                                          | This paper;<br>Sigma | N/A |
| Tyr ChIP FP<br>GGGAGGAAAGGGTGCTTGAG                                          | This paper;<br>Sigma | N/A |
| Tyr ChIP RP<br>AGGCTTGGGTTGTAATGCCA                                          | This paper;<br>Sigma | N/A |
| Tyrp1 ChIP FP<br>CCAGTGTGAGGAATCTGGCTTG                                      | This paper;<br>Sigma | N/A |
| Tyrp1 ChIP RP<br>TGCCAGCTGTTAATTGCCCG                                        | This paper;<br>Sigma | N/A |
| mH2a.z.2 A14T oligo<br>GACAGTGGGAAGGCCAAGACTAAGGCG<br>GTGTCTCGTTCC           | This paper;<br>Sigma | N/A |
| mH2a.z.2 A14T oligo complement<br>GGAACGAGACACCGCCTTAGTCTTGCC<br>TTCCCACTGTC | This paper;<br>Sigma | N/A |
| mH2a.z.2 T38S oligo<br>CACAGACACTTGAAGAGTCGCACCACAA<br>GCCATG                | This paper;<br>Sigma | N/A |
| mH2a.z.2 T38S complement<br>CATGGCTTGTGGTGCGACTCTTCAAGTG<br>TCTGTG           | This paper;<br>Sigma | N/A |
| mH2a.z.2 A127V oligo<br>GGGCAGCAGAAAAGTTCCTCCGGGCC<br>GC                     | This paper;<br>Sigma | N/A |

|                                                                      |                                       |     |
|----------------------------------------------------------------------|---------------------------------------|-----|
| mH2a.z.2 A127V oligo complement<br>GCGGGCCCGGGAACAGTTTTCTGCTGC<br>CC | This paper;<br>Sigma                  | N/A |
| <b>Recombinant DNA</b>                                               |                                       |     |
| Mouse H2a.z.2 CDS – Zero TOPO Blunt                                  | This paper                            | N/A |
| Mouse H2a.z.1 CDS – Zero TOPO Blunt                                  | This paper                            | N/A |
| Zebrafish <i>mitfa</i> CDS – Zero TOPO Blunt                         | This paper                            | N/A |
| pIRES-mouse H2a.z.2 CDS                                              | This paper                            | N/A |
| Zebrafish <i>h2a.z.2</i> -3'UTR WISH probe construct                 | This paper                            | N/A |
| Zebrafish <i>foxd3</i> WISH probe construct                          | Stewart R.A et al; 2006; Dev Biol     | N/A |
| Zebrafish <i>sox10</i> WISH probe construct                          | Stewart R.A et al; 2006; Dev Biol     | N/A |
| Zebrafish <i>tfap2a</i> WISH probe construct                         | Stewart R.A et al; 2006; Dev Biol     | N/A |
| Zebrafish <i>crestin</i> WISH probe construct                        | Stewart R.A et al; 2006; Dev Biol     | N/A |
| Zebrafish <i>sox9a</i> WISH probe construct                          | Yan YL et al; 2005; Development       | N/A |
| Zebrafish <i>sox9b</i> WISH probe construct                          | Yan YL et al; 2005; Development       | N/A |
| Zebrafish <i>krox20</i> WISH probe construct                         | Fiejoo CG et al; 2009; Mol Cell Neuro | N/A |
| Zebrafish <i>mbp</i> WISH probe construct                            | Brosamle C et al; 2002; Glia          | N/A |
| Zebrafish <i>neurod1</i> WISH probe construct                        | Rauch G; 2003                         | N/A |
| Zebrafish <i>mitfa</i> WISH probe construct                          | Lister JA et al; 1999; Development    | N/A |
| Zebrafish <i>dct</i> WISH probe construct                            | Lister JA et al; 1999; Development    | N/A |
| Zebrafish <i>c-kit</i> WISH probe construct                          | Parichy DM et al; 1999; Development   | N/A |
| Zebrafish <i>is/2a</i> WISH probe construct                          | Asad Z et al; 2016; Hum Mol Genetics  | N/A |
| <b>Softwares and Algorithm</b>                                       |                                       |     |



|                     |                                 |                                                                                                     |
|---------------------|---------------------------------|-----------------------------------------------------------------------------------------------------|
| R Studio i386 3.5.3 |                                 | N/A                                                                                                 |
| Prism 7.0           | Graphpad Software               | N/A                                                                                                 |
| Reactome PA         | Yu G et al; 2016, Mol Biosystem | <a href="https://github.com/GuangchuanYu/ReactomePA">https://github.com/GuangchuanYu/ReactomePA</a> |
| ImageJ              | Schneider et al., 2012          | <a href="https://imagej.nih.gov/ij/">https://imagej.nih.gov/ij/</a>                                 |
|                     |                                 |                                                                                                     |
